# Supplementary material for: Estimating the incidence, prevalence and true cost of asthma in the UK: secondary analysis of national stand-alone and linked databases in England, Northern Ireland, Scotland and Wales—a study protocol
Source: HighWire-hosted journal article supplement (doi:10.1136/bmjopen-2014-006647), 2014-11-01
Supplement: bmjopen-2014-006647supp_appendix2.pdf [file bmjopen-2014-006647supp_appendix2.pdf]

## Appendix 2: Read codes for asthma, version 2

| Code  | Term                                            |
|-------|-------------------------------------------------|
| H33.. | Asthma                                          |
| H330. | Extrinsic (atopic) asthma                       |
| H3300 | Extrinsic asthma without status asthmaticus     |
| H3301 | Extrinsic asthma with status asthmaticus        |
| H330z | Extrinsic asthma NOS                            |
| H331. | Intrinsic asthma                                |
| H3310 | Intrinsic asthma without status asthmaticus     |
| H3311 | Intrinsic asthma with status asthmaticus        |
| H331z | Intrinsic asthma NOS                            |
| H332. | Mixed asthma                                    |
| H333. | Acute exacerbation of asthma                    |
| H334. | Brittle asthma                                  |
| H335. | Chronic asthma with fixed airflow obstruction   |
| H33z. | Asthma unspecified                              |
| H33z0 | Status asthmaticus NOS                          |
| H33z1 | Asthma attack                                   |
| H33z2 | Late-onset asthma                               |
| H33zz | Asthma NOS                                      |
| 1780. | Aspirin induced asthma                          |
| 1781. | Asthma trigger - pollen                         |
| 1782. | Asthma trigger - tobacco smoke                  |
| 1783. | Asthma trigger - warm air                       |
| 1784. | Asthma trigger - emotion                        |
| 1785. | Asthma trigger - damp                           |
| 1786. | Asthma trigger - animals                        |
| 1787. | Asthma trigger - seasonal                       |
| 1788. | Asthma trigger - cold air                       |
| 1789. | Asthma trigger - respiratory infection          |
| 178A. | Asthma trigger - airborne dust                  |
| 178B. | Asthma trigger - exercise                       |
| 102.. | Asthma confirmed                                |
| 66YK. | Asthma follow-up                                |
| 663.. | Asthma monitoring                               |
| 663N. | Asthma disturbing sleep                         |
| 663N0 | Asthma causing night waking                     |
| 663N1 | Asthma disturbs sleep weekly                    |
| 663N2 | Asthma disturbs sleep frequently                |
| 663O. | Asthma not disturbing sleep                     |
| 663O0 | Asthma never disturbs sleep                     |
| 663P. | Asthma limiting activities                      |
| 663P0 | Asthma limits activities 1 to 2 times per month |
| 663P1 | Asthma limits activities 1 to 2 times per week  |
| 663P2 | Asthma limits activities most days              |
| 663Q. | Asthma not limiting activities                  |
| 663U. | Asthma management plan given                    |
| 663V. | Asthma severity                                 |

| <b>Code</b> | <b>Term</b>                                                  |
|-------------|--------------------------------------------------------------|
| 663V0       | Occasional asthma                                            |
| 663V1       | Mild asthma                                                  |
| 663V2       | Moderate asthma                                              |
| 663V3       | Severe asthma                                                |
| 663W.       | Asthma prophylactic medication used                          |
| 663d.       | Emergency asthma admission since last appointment            |
| 663e.       | Asthma restricts exercise                                    |
| 663f.       | Asthma never restricts exercise                              |
| 663h.       | Asthma - currently dormant                                   |
| 663j.       | Asthma - currently active                                    |
| 663m.       | Asthma accident and emergency attendance since last visit    |
| 663n.       | Asthma treatment compliance satisfactory                     |
| 663p.       | Asthma treatment compliance unsatisfactory                   |
| 663q.       | Asthma daytime symptoms                                      |
| 663r.       | Asthma causes night symptoms 1 to 2 times per month          |
| 663s.       | Asthma never causes daytime symptoms                         |
| 663t.       | Asthma causes daytime symptoms 1 to 2 times per month        |
| 663u.       | Asthma causes daytime symptoms 1 to 2 times per week         |
| 663v.       | Asthma causes daytime symptoms most days                     |
| 663w.       | Asthma limits walking up hills or stairs                     |
| 663x.       | Asthma limits walking on the flat                            |
| 663y.       | Number of asthma exacerbations in past year                  |
| 66YJ.       | Asthma annual review                                         |
| 66YE.       | Asthma monitoring due                                        |
| 66Y5.       | Change in asthma management plan                             |
| 66Y9.       | Step up change in asthma management plan                     |
| 66YA.       | Step down change in asthma management plan                   |
| 66Yq.       | Asthma causes night time symptoms 1 to 2 times per week      |
| 66Yr.       | Asthma causes symptoms most nights                           |
| 66Yp.       | Asthma review using Roy Colleg of Physicians three questions |
| 8CMA0       | Patient has a written asthma personal action plan            |
| 8B3j.       | Asthma medication review                                     |
| 8793.       | Asthma control step 0                                        |
| 8794.       | Asthma control step 1                                        |
| 8795.       | Asthma control step 2                                        |
| 8796.       | Asthma control step 3                                        |
| 8797.       | Asthma control step 4                                        |
| 8798.       | Asthma control step 5                                        |
| 90J1.       | Attends asthma monitoring                                    |
| 90JA.       | Asthma monitoring check done                                 |
| 173d.       | Work aggravated asthma                                       |
| 663e0       | Asthma sometimes restricts exercise                          |
| 663e1       | Asthma severely restricts exercise                           |
| 66YC.       | Absent from work or school due to asthma                     |
| 66YK.       | Asthma follow-up                                             |
| 66YP.       | Asthma night-time symptoms                                   |
| 66YQ.       | Asthma monitoring by nurse                                   |
| 66YR.       | Asthma monitoring by doctor                                  |

| <b>Code</b> | <b>Term</b>                                                  |
|-------------|--------------------------------------------------------------|
| 66Ys.       | Asthma never causes night symptoms                           |
| 66Yu.       | Number days absent from school due to asthma in past 6 month |
| 8791.       | Further asthma - drug prevent.                               |
| 8CR0.       | Asthma clinical management plan                              |
